# Supplementary material for: Double-layer capsule of mesoporous ZnO@SnO2 for sensitive detection of triethylamine
Source: Royal Society of Chemistry journal article supplement (doi:10.1039/d1an01125a), 2021-01-01
Supplement: d1an01125a1.pdf [file d1an01125a1.pdf]

## Supporting Information

### Double-layer Capsule of Mesoporous ZnO@SnO<sub>2</sub> for Sensitive Detection of Triethylamine

Ming Yin<sup>†1</sup>, Li Zhang<sup>†1</sup>, Tianyi Qiu<sup>2</sup>, Yan Chen<sup>1</sup>, Shuyan Qi<sup>1</sup>, Xiuxia  
Wei<sup>1</sup>, Xinxin Tian<sup>1</sup>, Kangjie Ge<sup>1</sup>, Jingxuan Qiu<sup>1</sup>, Dongpo Xu<sup>1\*</sup>

1 School of Medical Instrument and Food Engineering, University of  
Shanghai for Science and Technology, Shanghai 200093, PR China.

2 Shanghai Public Health Clinical Center

\*Corresponding author: xudongpo@usst.edu.cn

<sup>†</sup> Ming Yin and Li Zhang contributed equally in this work

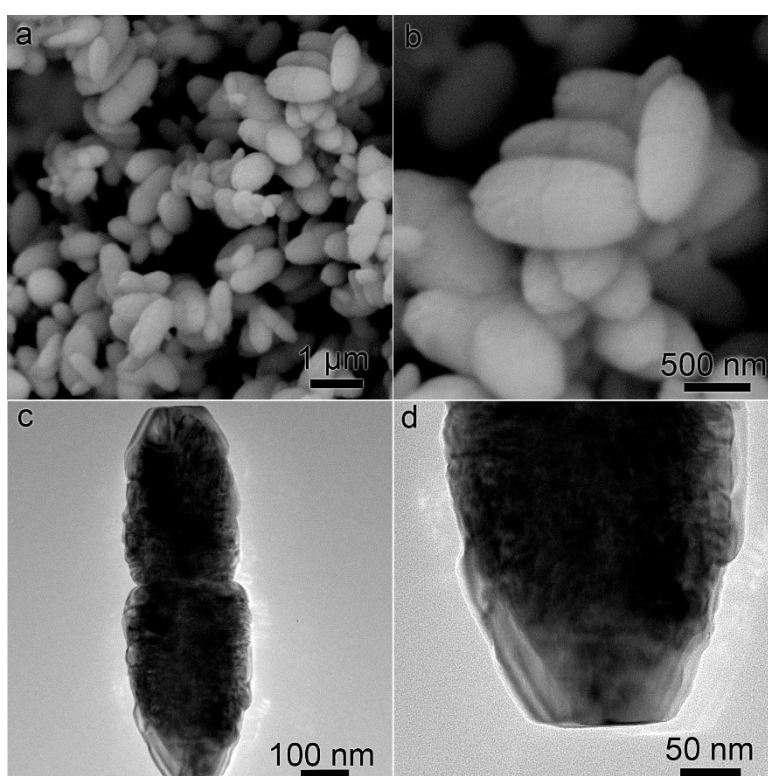

**Fig. S1.** SEM and TEM images of capsule ZIF-8 nanoparticles synthesized by the bola-form surfactant as the template.
